# Supplementary material for: Screening for Variation in Leaf Elemental Content Between Croatian Autochthonous Kale (Brassica oleracea L. var. acephala) Accessions
Source: MDPI journal article supplement (doi:10.3390/horticulturae12010012), 2025-12-23
Supplement: s1 [file horticulturae-3933302-supplementary.pdf › horticulturae-3933302-supplementary.pdf]

Supplementary table S1. ICP-OES recovery rates of reference materials, limits of detection and quantification of reference standards.

| Element | Limit of detection<br>(mg/L) | Limit of quantification<br>(mg/L) | Recovery rate of<br>reference sample (%) |
|---------|------------------------------|-----------------------------------|------------------------------------------|
| Al      | 0.0028152                    | 0.009384                          | 93.22                                    |
| B       | 0.0020049                    | 0.0066831                         | 91.10                                    |
| Ca      | 0.0011148                    | 0.0037158                         | 91.45                                    |
| Cd      | 0.001438                     | 0.0047933                         | 93.87                                    |
| Co      | 0.000660                     | 0.0021984                         | 90.75                                    |
| Cr      | 0.000389                     | 0.0012983                         | 92.22                                    |
| Cu      | 0.0128066                    | 0.0426886                         | 98.65                                    |
| Fe      | 0.0054306                    | 0.018102                          | 105.20                                   |
| K       | 0.0143125                    | 0.0477082                         | 101.35                                   |
| Li      | 0.0010571                    | 0.0035237                         | 93.10                                    |
| Mg      | 0.0011551                    | 0.0038502                         | 96.38                                    |
| Mn      | 0.0017253                    | 0.0057511                         | 101.80                                   |
| Mo      | 0.000838                     | 0.0027931                         | 93.45                                    |
| Na      | 0.015821                     | 0.0527367                         | 94.12                                    |
| Ni      | 0.0006064                    | 0.0020193                         | 91.15                                    |
| P       | 0.0013853                    | 0.0046175                         | 103.68                                   |
| Pb      | 0.0141096                    | 0.0470321                         | 90.25                                    |
| S       | 0.0074751                    | 0.0249172                         | 94.44                                    |
| Se      | 0.0095068                    | 0.0316893                         | 91.21                                    |
| Si      | 0.09509                      | 0.3169668                         | 97.00                                    |
| Zn      | 0.0015209                    | 0.0050696                         | 98.39                                    |
